# Supplementary material
Source: PubMed Central journal article supplement (PMC1955692)
Supplement: plntcell_tpc.107.050807_1.pdf [file plntcell_tpc.107.050807_1.pdf]

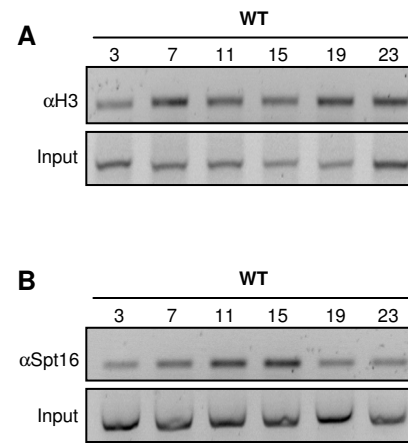

**Supplemental Figure 1.** Pattern of H3 occupancy and Spt16 binding to the *TOC1* promoter. **(A)** Representative PCR bands from ChIP assays in WT seedlings entrained under 12h light: 12h dark (LD) cycles and subsequently released to constant light conditions (LL). Chromatin was immuno-precipitated using an antibody to unmodified histone H3 ( $\alpha$ H3). **(B)** Representative PCR bands from WT seedlings entrained under LD cycles and shifted to LL conditions. Samples were processed by ChIP assays with anti-Spt16 antibody. Input DNA was used as control.
