# Supplementary material
Source: PubMed Central journal article supplement (PMC1955692)
Supplement: plntcell_tpc.107.050807_2.pdf [file plntcell_tpc.107.050807_2.pdf]

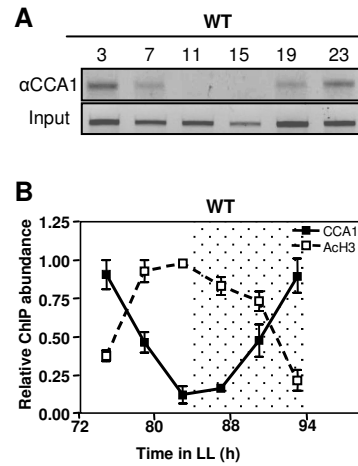

**Supplemental Figure 2.** Rhythmic binding of CCA1 to the *TOC1* promoter in WT seedlings. **(A)** Representative PCR bands from ChIP assays in WT seedlings entrained under 12h light: 12h dark cycles and subsequently released to LL conditions. Chromatin was immuno-precipitated using anti-CCA1 antibody. Input DNA was used as control. **(B)** Relative changes in CCA1 binding and H3 acetylation plotted relative to the highest value. Open and dotted boxes indicate the subjective day and subjective night, respectively.
