# Supplementary material
Source: PubMed Central journal article supplement (PMC1955692)
Supplement: plntcell_tpc.107.050807_3.pdf [file plntcell_tpc.107.050807_3.pdf]

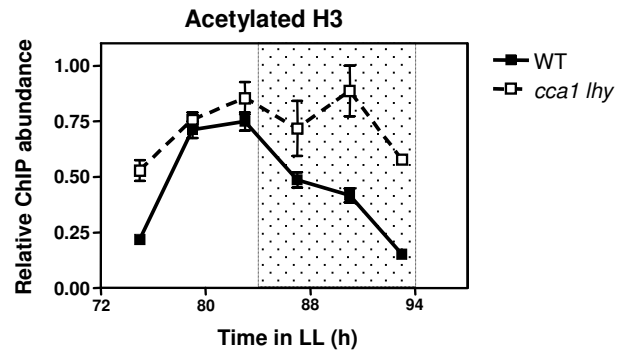

**Supplemental Figure 3.** *In vivo* H3 acetylation in WT and *cca1 lhy* double mutant plants. Relative changes in acetylated H3 at the *TOC1* promoter after ChIP assays in WT and *cca1 lhy* double mutant seedlings entrained under 12h light: 12h dark cycles and subsequently released to constant light conditions. Chromatin was immuno-precipitated using anti-acetylated histone H3 antibody. Input DNA was used as control and relative changes were plotted relative to the highest value. Open and dotted boxes indicate the subjective day and subjective night, respectively.
