# Supplementary material
Source: PubMed Central journal article supplement (PMC1955692)
Supplement: plntcell_tpc.107.050807_4.pdf [file plntcell_tpc.107.050807_4.pdf]

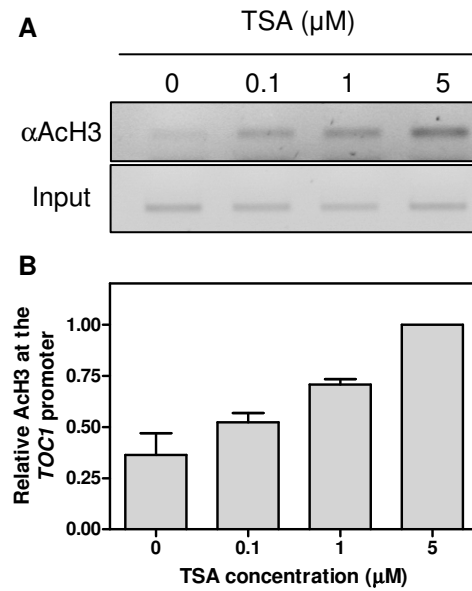

**Supplemental Figure 4.** H3 acetylation at the *TOC1* promoter in plants treated with different concentrations of TSA. **(A)** Representative PCR bands from ChIP assays in WT seedlings treated with 0, 0.1, 1 and 5  $\mu\text{M}$  of TSA. Seedlings were entrained under ShD (8h light: 16h dark) conditions and processed at ZT15. Chromatin was immuno-precipitated using anti-acetylated histone H3 ( $\alpha\text{AcH3}$ ) antibody. Input DNA was used as control. **(B)** Relative changes in acetylated H3 plotted relative to the highest value.
