# Supplementary material
Source: PubMed Central journal article supplement (PMC1955692)
Supplement: plntcell_tpc.107.050807_5.pdf [file plntcell_tpc.107.050807_5.pdf]

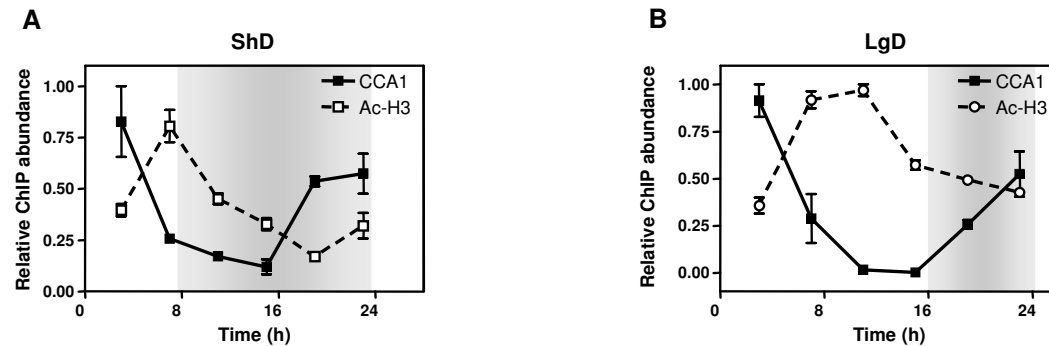

**Supplemental Figure 5.** Rhythmic binding of CCA1 to the *TOC1* promoter. Relative changes in CCA1 binding in WT seedlings grown under (A) short-days (8h light: 16h dark) or (B) long-days (16h light: 8h dark). Chromatin was immuno-precipitated using anti-CCA1 antibody and changes were plotted relative to the highest value. For comparison, the pattern of H3 acetylation under the different photoperiods (see Figure 4B) is also included. Open and solid boxes indicate the light and dark period, respectively.
