# Supplementary material
Source: PubMed Central journal article supplement (PMC1955692)
Supplement: plntcell_tpc.107.050807_6.pdf [file plntcell_tpc.107.050807_6.pdf]

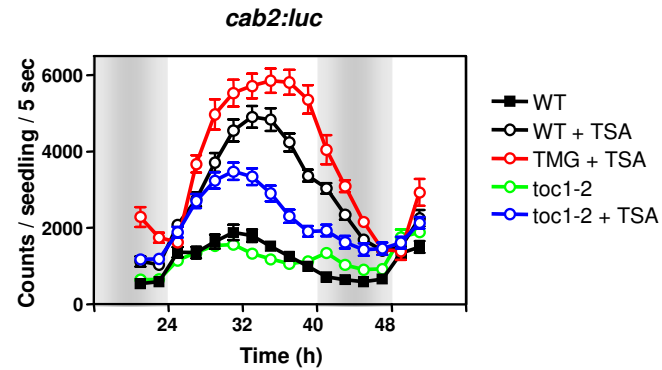

**Supplemental Figure 6.** Comparison of the effects of TSA treatment on *CAB2::LUC* expression in WT, TMG and *toc1-2* mutant plants. *CAB2::LUC* luminescence was examined in seedlings treated with 3  $\mu$ M TSA. Data are the means  $\pm$  SE of the luminescence of 6-12 individual seedlings. Open and solid boxes indicate the light and dark period, respectively.
