# Supplementary material
Source: PubMed Central journal article supplement (PMC1955692)
Supplement: plntcell_tpc.107.050807_7.pdf [file plntcell_tpc.107.050807_7.pdf]

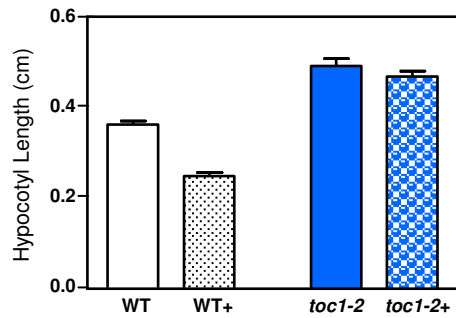

**Supplemental Figure 7.** Role of TOC1 in mediating the TSA-dependent effects on hypocotyl elongation. Hypocotyl lengths of WT and *toc1-2* mutant plants were examined in seedlings grown under under ShD (8h light:16h dark) conditions. Data are the mean hypocotyl length  $\pm$  SE of 15-20 seedlings grown in the presence (+) or absence of TSA.
