# Supplementary material
Source: PubMed Central journal article supplement (PMC1955692)
Supplement: plntcell_tpc.107.050807_8.pdf [file plntcell_tpc.107.050807_8.pdf]

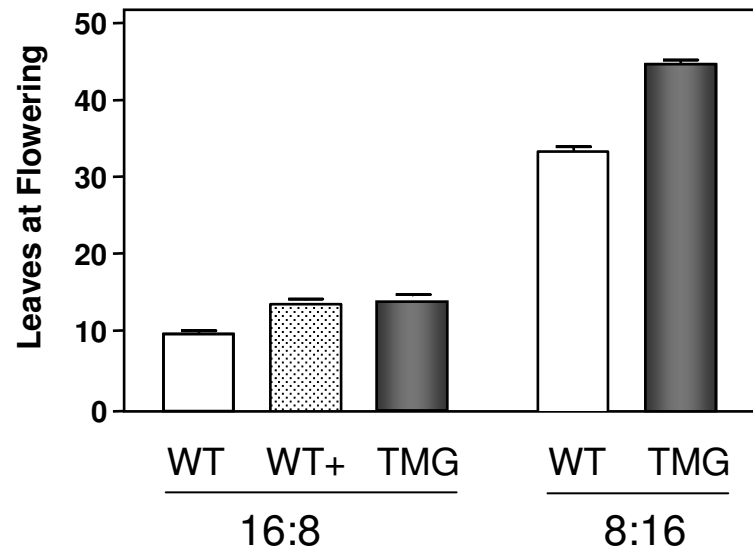

**Supplemental Figure 8.** Transition to flowering in WT plants in the presence (+) or absence of TSA and in TMG plants maintained under long-days (16h light:8h dark) or short-days (8h light:16h dark). Flowering time is represented as the number of leaves at flowering. The experiments were done twice with similar results.
