# Supplementary material
Source: PubMed Central journal article supplement (PMC1955692)
Supplement: plntcell_tpc.107.050807_9.pdf [file plntcell_tpc.107.050807_9.pdf]

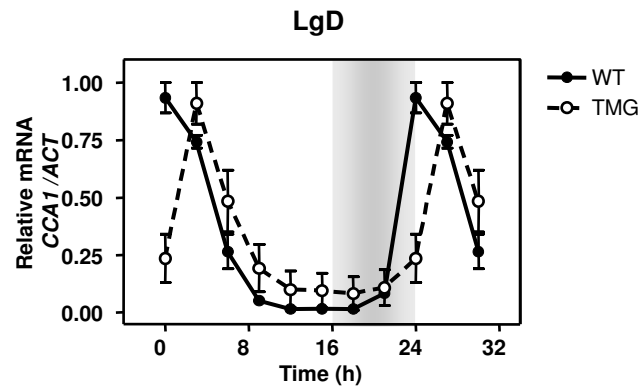

**Supplemental Figure 9.** Relative changes of *CCA1* expression in WT and TMG seedlings maintained under long-day (16h light:8h dark) conditions. *CCA1* expression was examined by Northern blot hybridization and changes were plotted relative to the highest value. Open and solid boxes indicate the light and dark period, respectively.
