# Supplementary material
Source: PubMed Central journal article supplement (PMC1955692)
Supplement: plntcell_tpc.107.050807_10.pdf [file plntcell_tpc.107.050807_10.pdf]

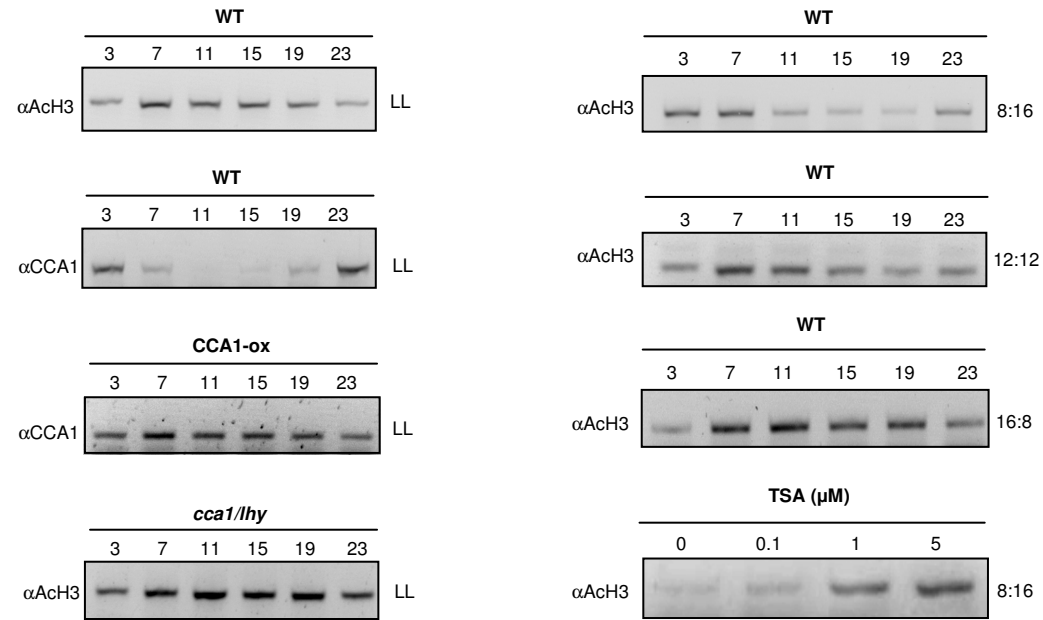

**Supplemental Figure 10.** SYBR green stained gels displaying PCR amplifications of the *TOC1* promoter. Representative PCR bands from ChIP assays in plants maintained under constant light conditions (LL) or under entraining light:dark cycles of 8h light:16h dark (8:16), 12h light:12h dark (12:12) or 16h light:8h dark (16:8). Chromatin was immunoprecipitated using the indicated antibodies.
